# Supplementary material for: Loss of the androgen receptor suppresses intrarenal calcium oxalate crystals deposition via altering macrophage recruitment/M2 polarization with change of the miR-185-5p/CSF-1 signals
Source: PubMed Central journal article supplement (PMC6427030; doi:10.1038/s41419-019-1358-y), 2019-03-20

# Supplementary Figure 1

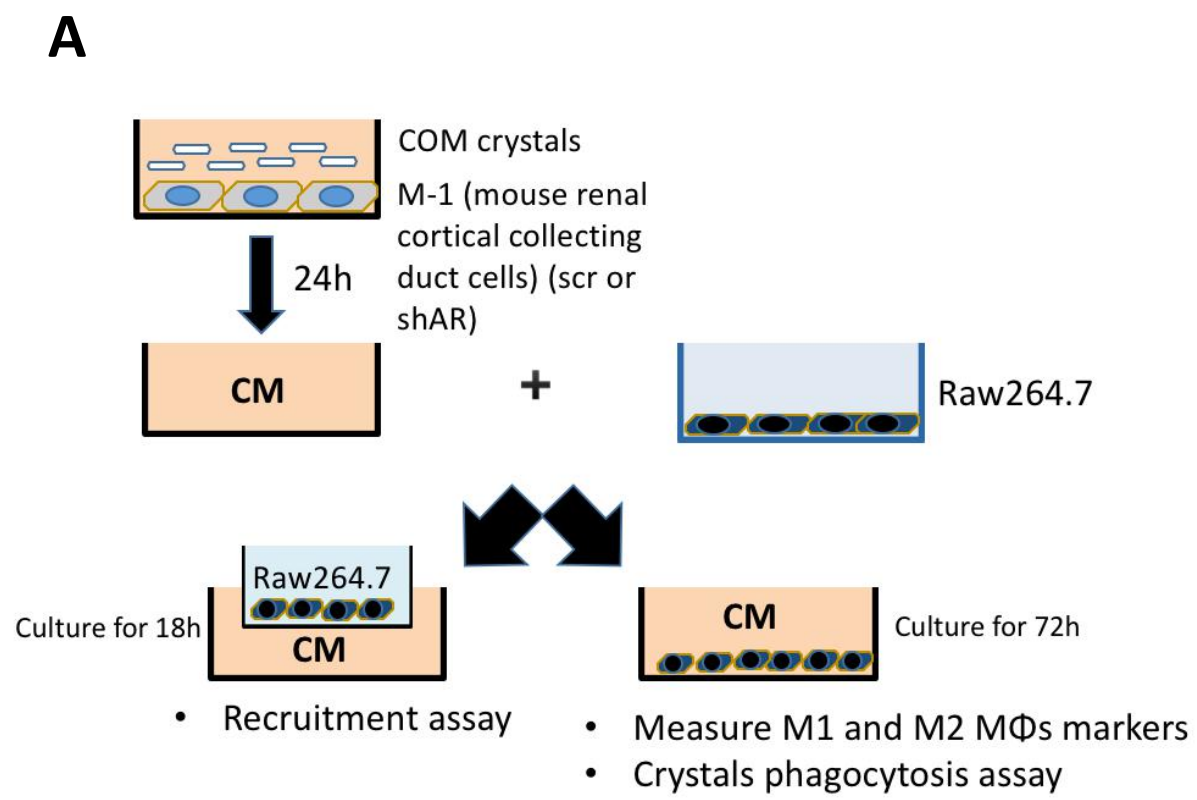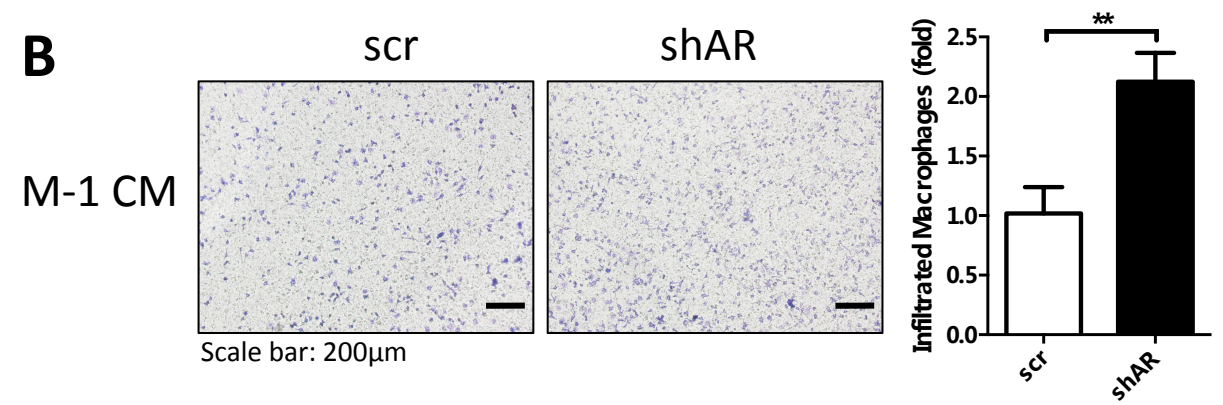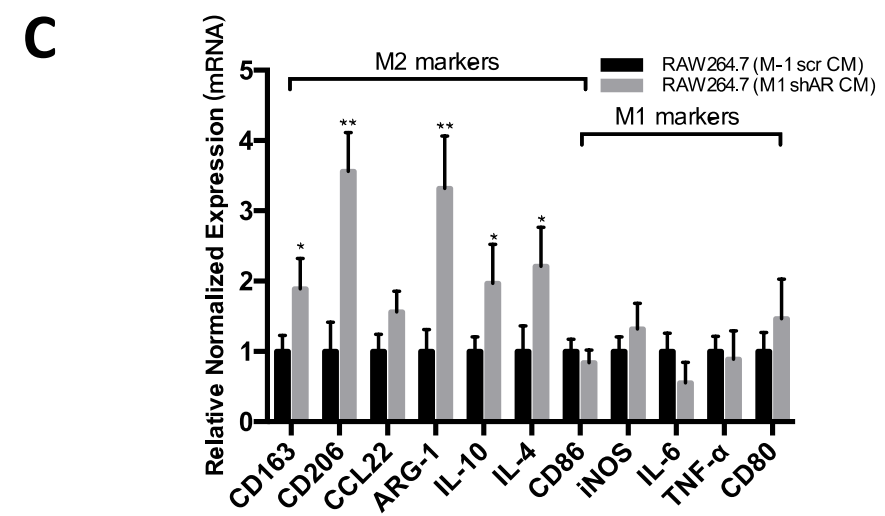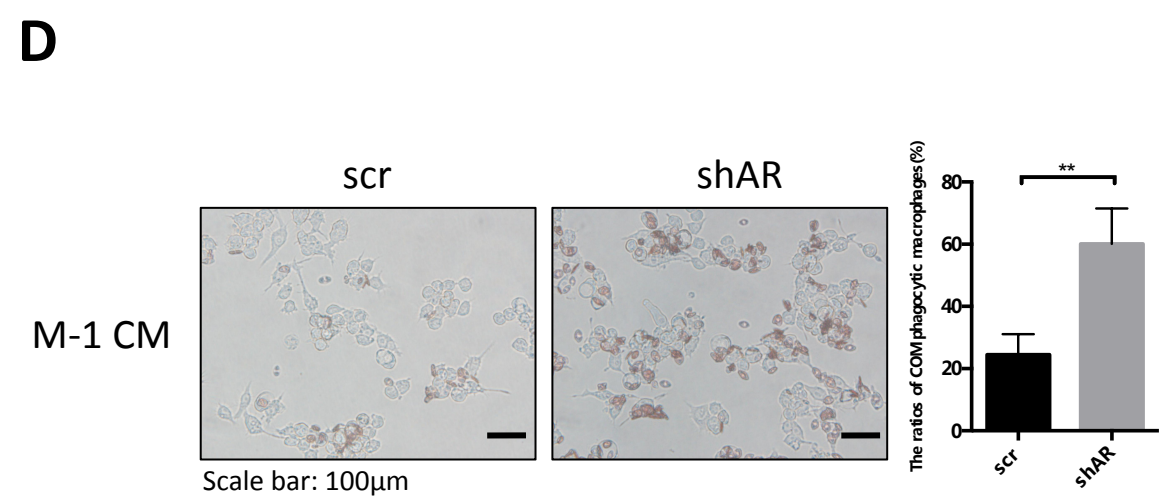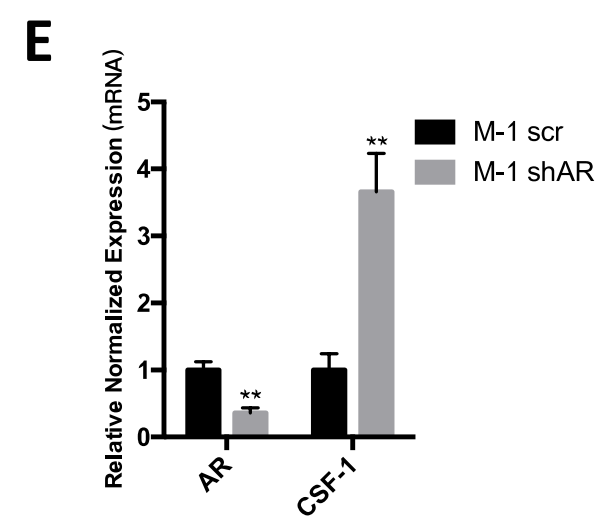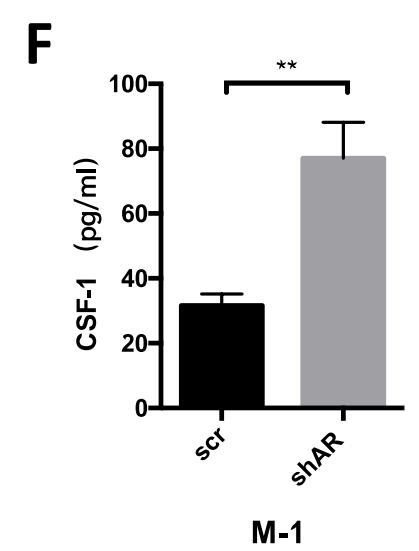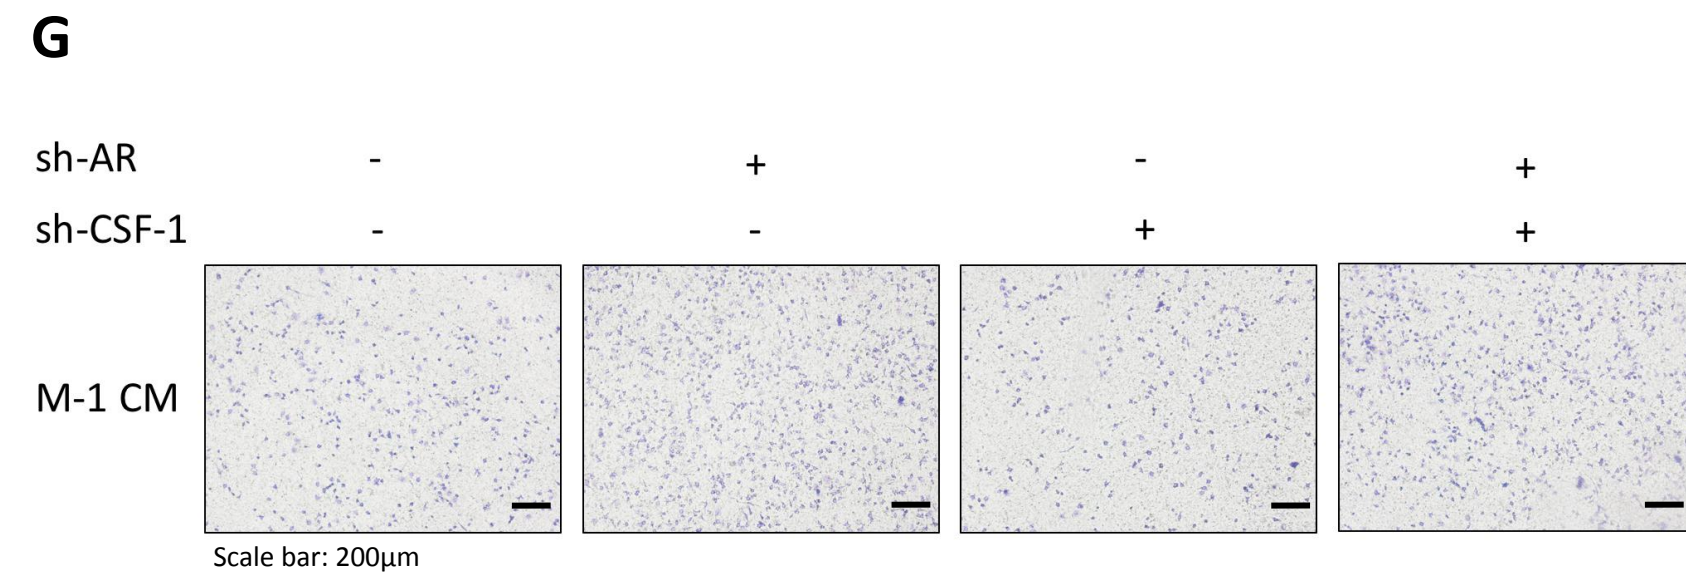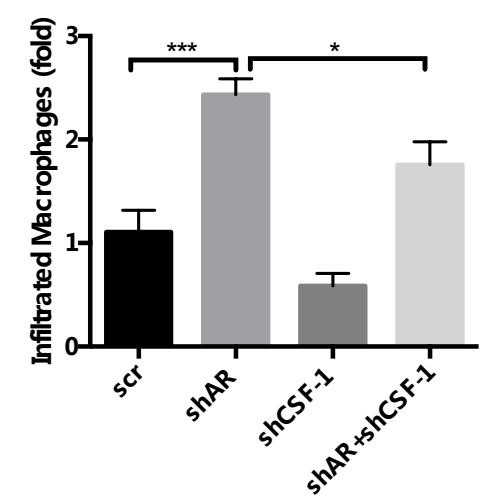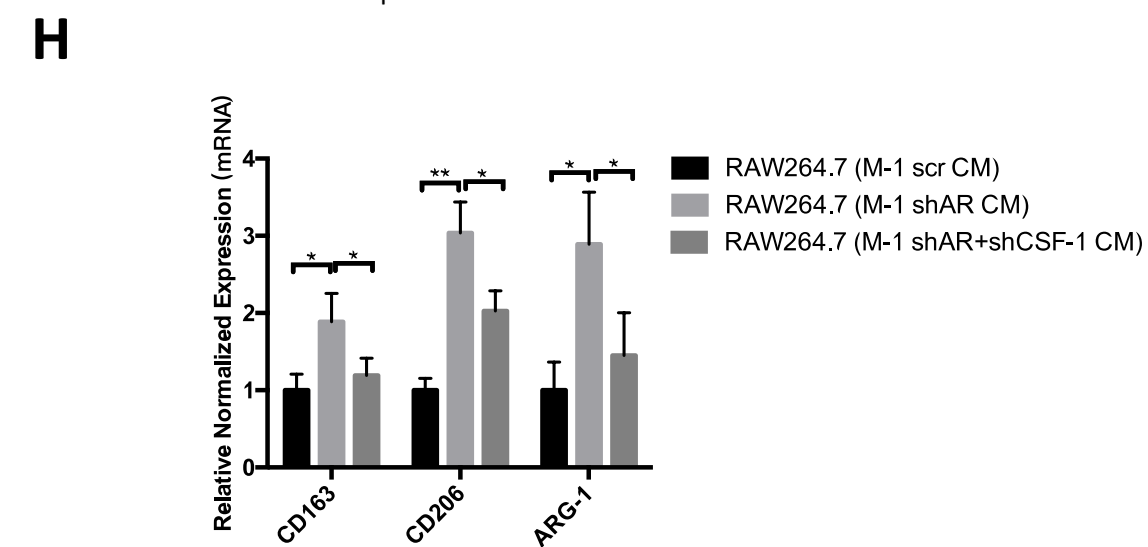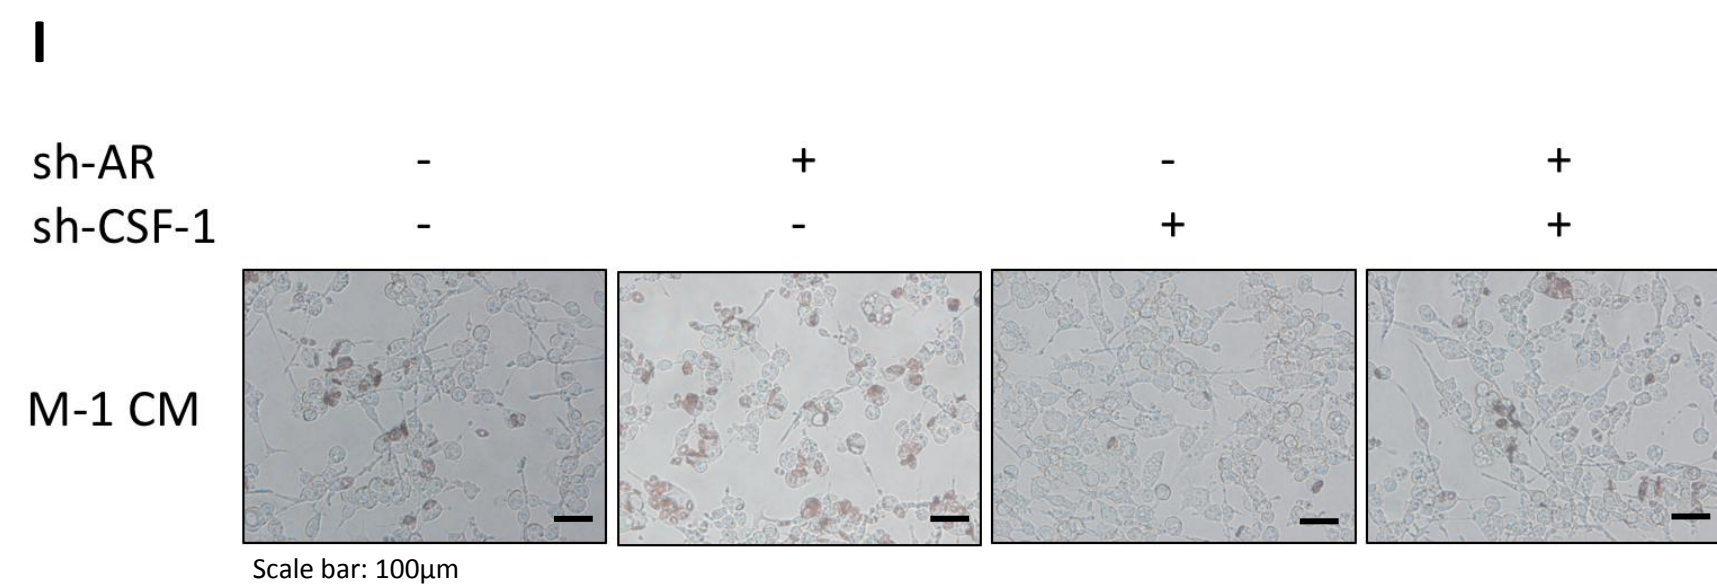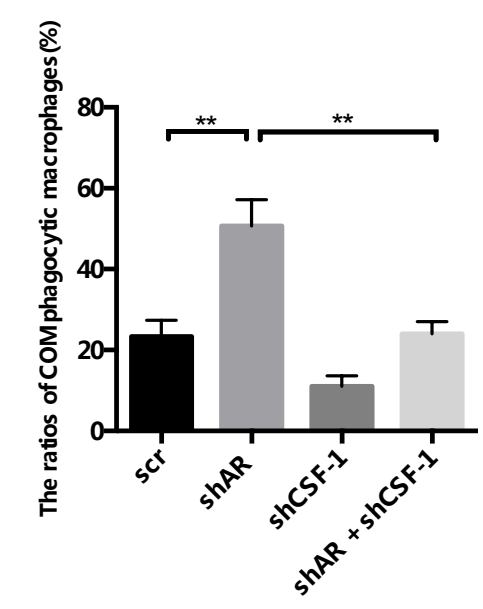

Supplement: 41419_2019_1358_MOESM3_ESM.pdf [file 41419_2019_1358_MOESM3_ESM.pdf]
