# Supplementary material for: Loss of the androgen receptor suppresses intrarenal calcium oxalate crystals deposition via altering macrophage recruitment/M2 polarization with change of the miR-185-5p/CSF-1 signals
Source: PubMed Central journal article supplement (PMC6427030; doi:10.1038/s41419-019-1358-y), 2019-03-20

# Supplementary Figure 2

**A**

The second shAR targeted sequence (pLKO.1)

shAR(2) F CCGGGAGCGTGGACTTTCCGGAAATGGATCCATTTCCGGAAAGTCCACGCTCTTTTG  
 shAR(2) R AATTCAAAAAGAGCGTGGACTTTCCGGAAATGGATCCATTTCCGGAAAGTCCACGCTC

**B**

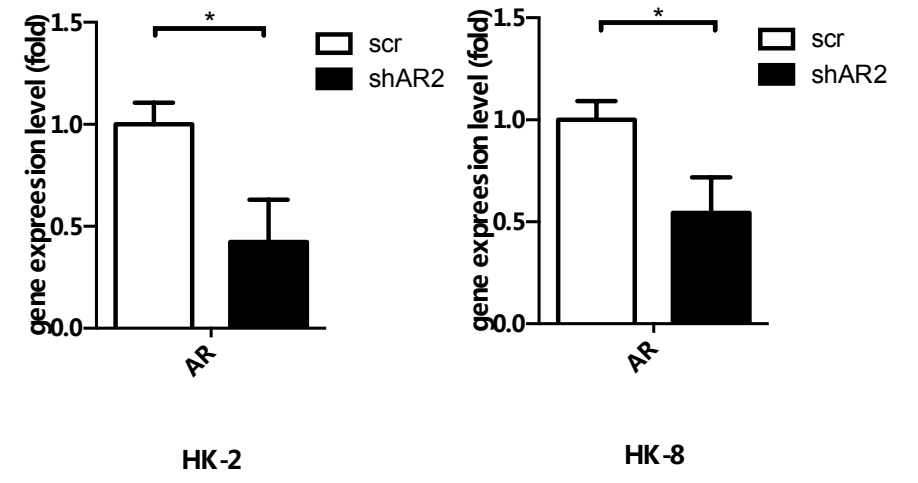

**C**

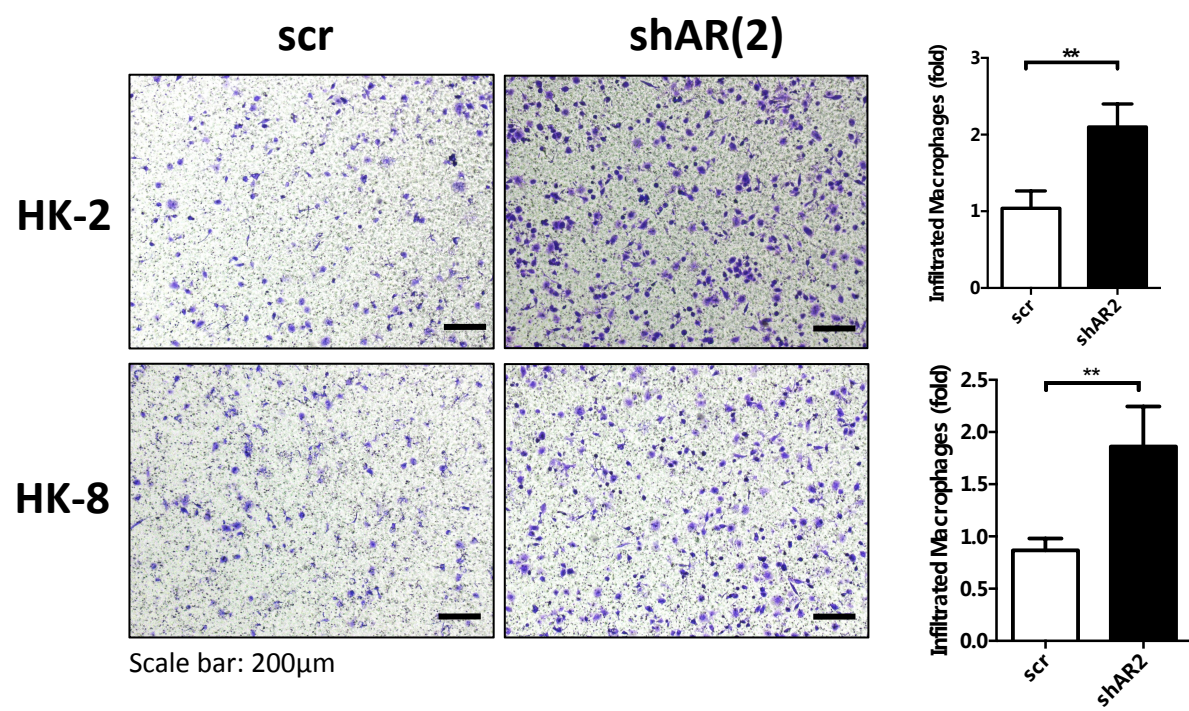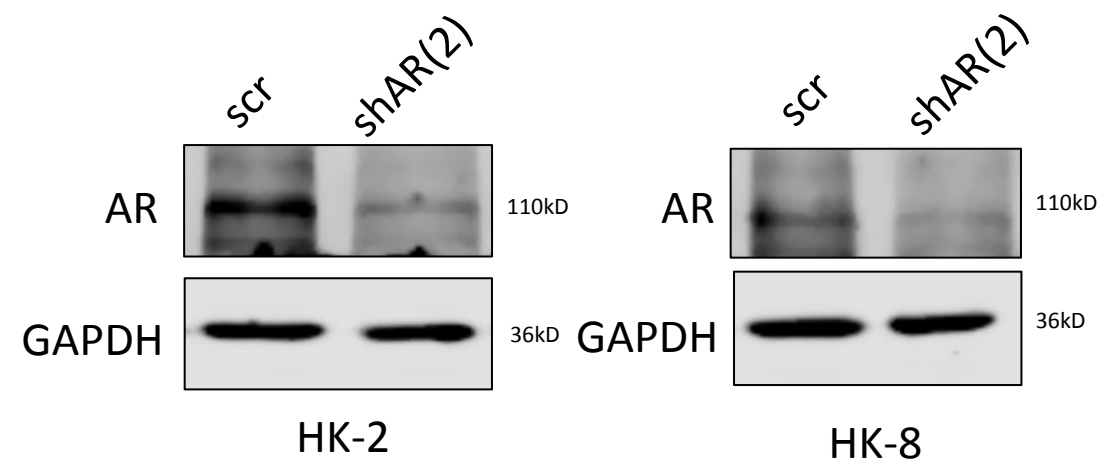

**D**

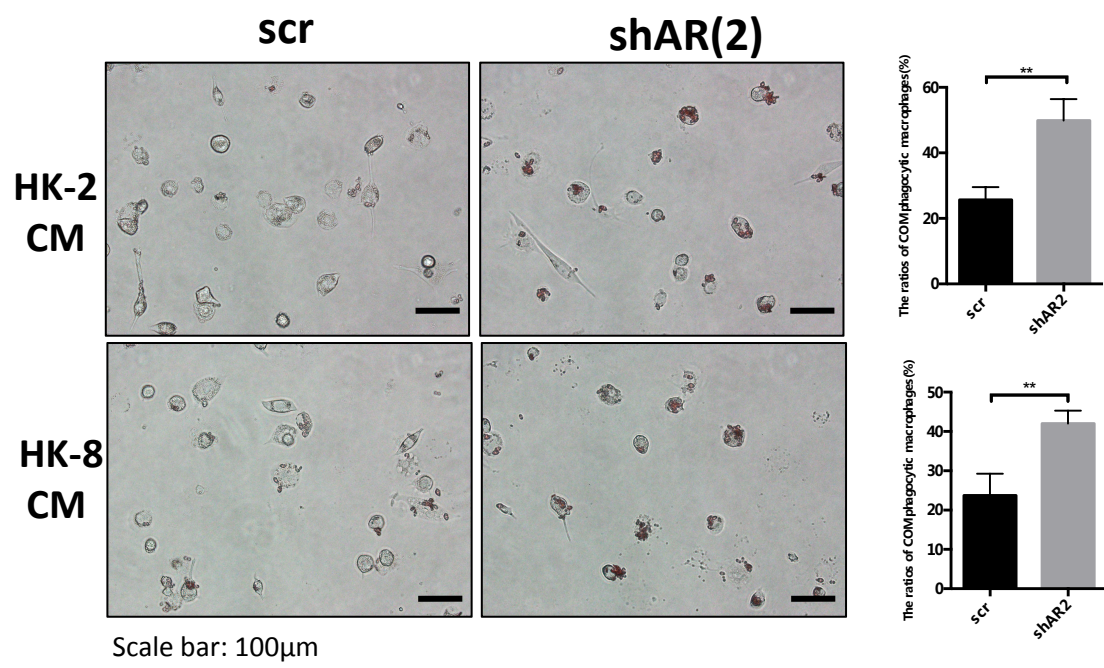

**E**

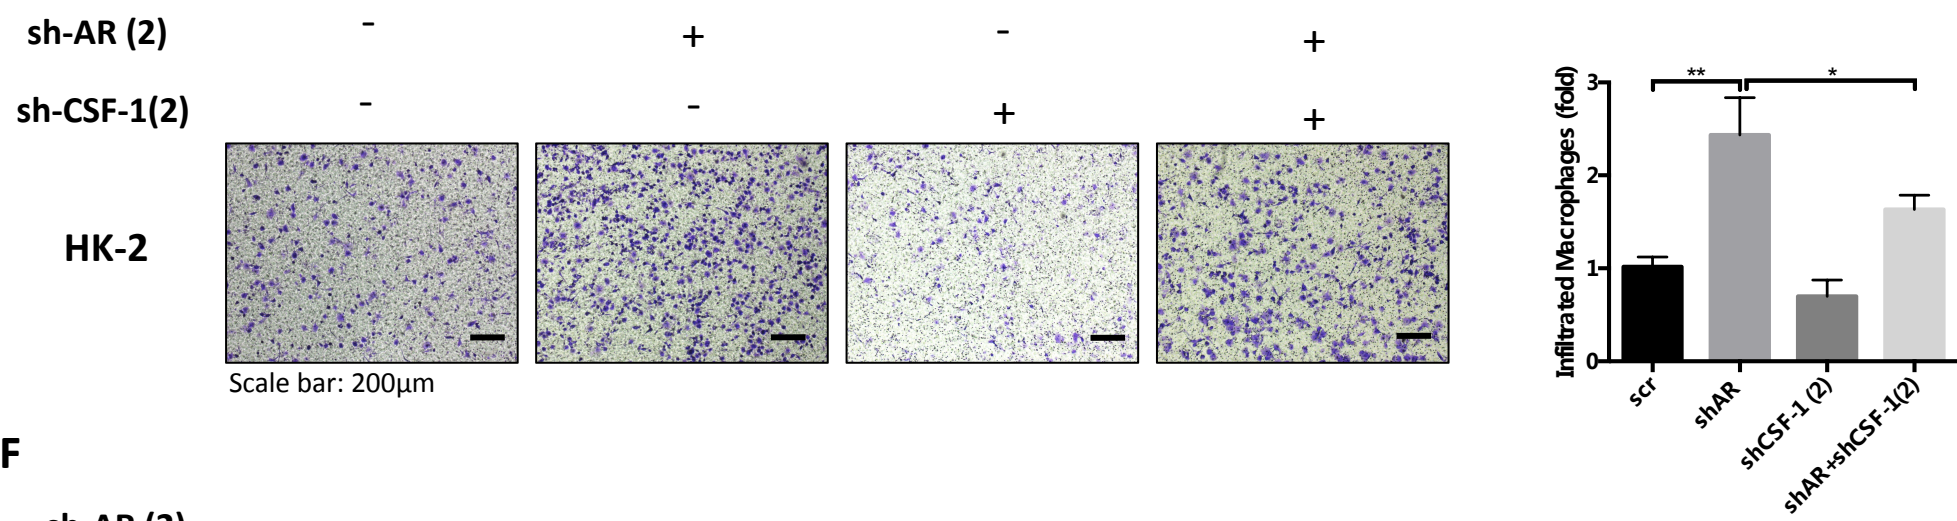

**F**

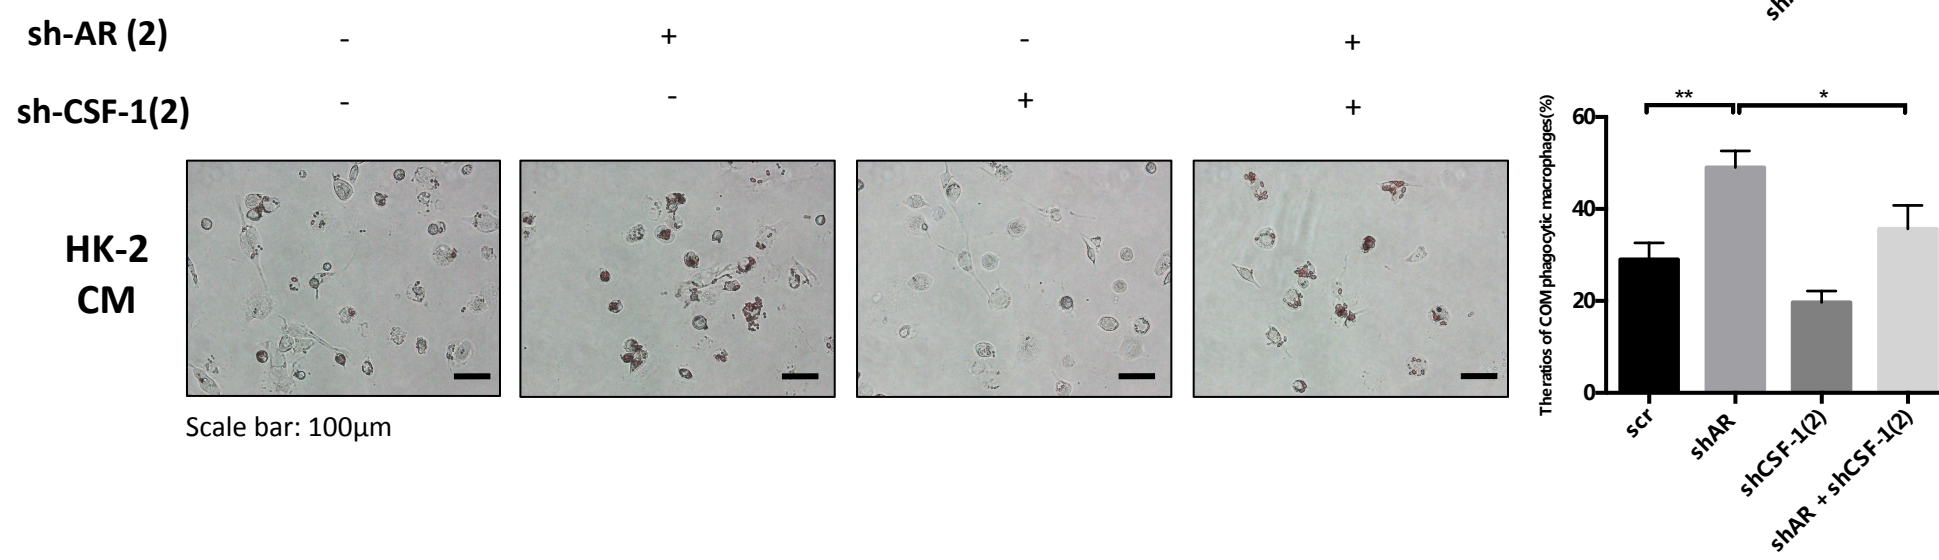

Supplement: 41419_2019_1358_MOESM5_ESM.pdf [file 41419_2019_1358_MOESM5_ESM.pdf]
